# Supplementary material for: Dual-readout performance of Eu3+-doped nanoceria as a phosphatase mimic for degradation and detection of organophosphate
Source: Royal Society of Chemistry journal article supplement (doi:10.1039/d1ay01080h), 2021-01-01
Supplement: d1ay01080h1.pdf [file d1ay01080h1.pdf]

## **Dual-readout performance of Eu<sup>3+</sup>-doped nanocerium as a phosphatase mimic for degradation and detection of organophosphate**

Wendi Lv <sup>a</sup>, Xiaoying Yuan <sup>a</sup>, Chenglu Yan <sup>a</sup>, Qiuting Ma <sup>a</sup>, Bing Wang <sup>a</sup>, Juan Du <sup>a,b\*</sup>,  
Baozhan Zheng <sup>a,c\*</sup> and Dan Xiao <sup>a,b</sup>

<sup>a</sup> *College of Chemistry, Sichuan University, Chengdu 610064, China*

<sup>b</sup> *Key Laboratory of Green Chemistry and Technology, Ministry of Education, Sichuan University, Chengdu 610064, China*

<sup>c</sup> *School of Chemistry and Chemical Engineering, Henan Normal University, Xinxiang 453000, China*

*\*Corresponding authors: [dujuanchem@scu.edu.cn](mailto:dujuanchem@scu.edu.cn) (J. Du); [zhengbaozhan@scu.edu.cn](mailto:zhengbaozhan@scu.edu.cn) (B. Zheng)*

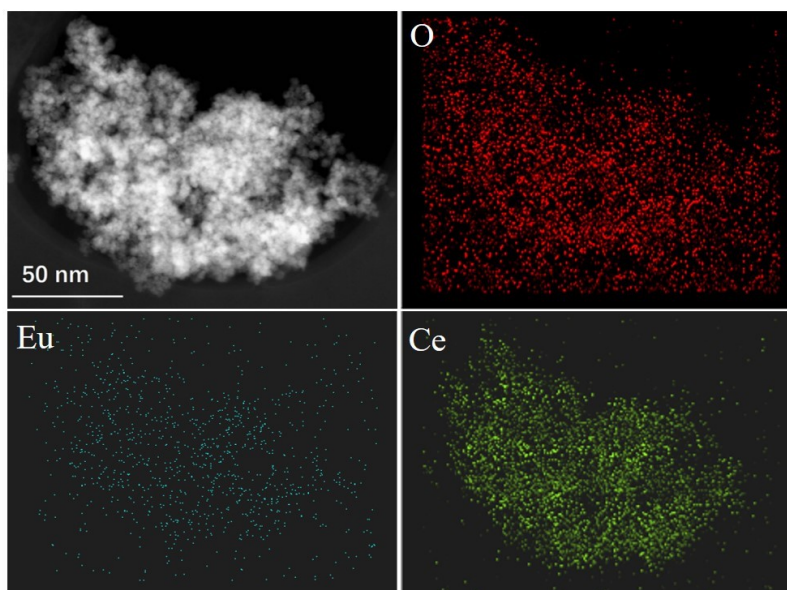

Fig. S1 Elemental map distributions of O, Ce and Eu in Eu:CeO<sub>2</sub>.

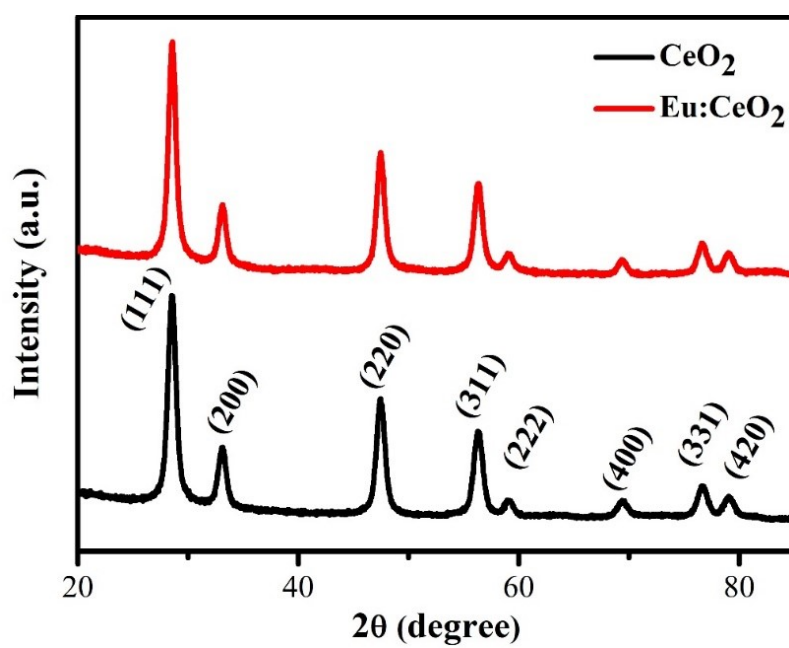

Fig. S2 XRD pattern of CeO<sub>2</sub> and Eu:CeO<sub>2</sub>.

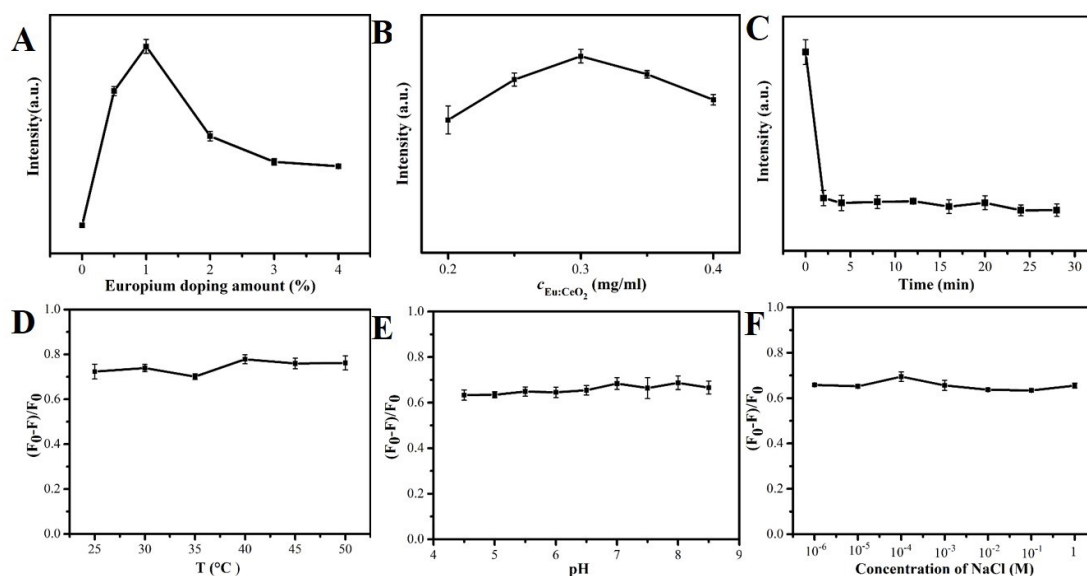

Fig. S3 (A) Effect of europium doping amount on the fluorescence intensity of Eu:CeO<sub>2</sub> at 592 nm; (B) Effect of Eu:CeO<sub>2</sub> content on the fluorescence intensity of Eu:CeO<sub>2</sub> at 592 nm; (C) Effect of reaction time on the fluorescence intensity of Eu:CeO<sub>2</sub> at 592 nm in the presence of p-NPP ( $c_{p-NPP}=990 \mu\text{M}$ ); (D) Effect of temperature on the fluorescence quenching rate  $(F_0-F)/F_0$  of the system in the presence of p-NPP ( $c_{p-NPP}=990 \mu\text{M}$ ); (E) Effect of pH on the fluorescence quenching rate  $(F_0-F)/F_0$  of the system in the presence of p-NPP ( $c_{p-NPP}=990 \mu\text{M}$ ); (F) Effect of different concentrations of NaCl on the fluorescence quenching rate  $(F_0-F)/F_0$  of Eu:CeO<sub>2</sub> (range from 1.0  $\mu\text{M}$  to 1.0 M).

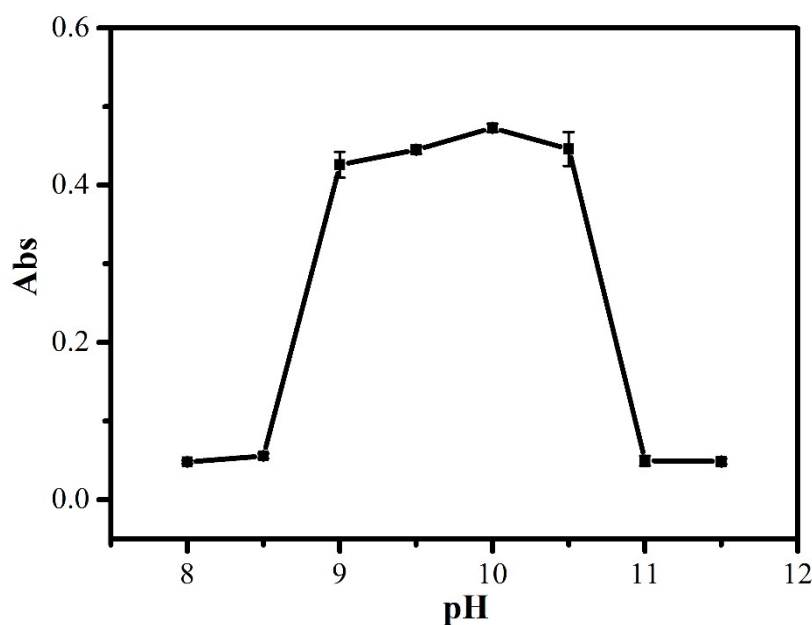

Fig. S4 Effect of pH on absorbance value of the system in the presence of p-NPP ( $c_{p-NPP}=290 \mu\text{M}$ ).

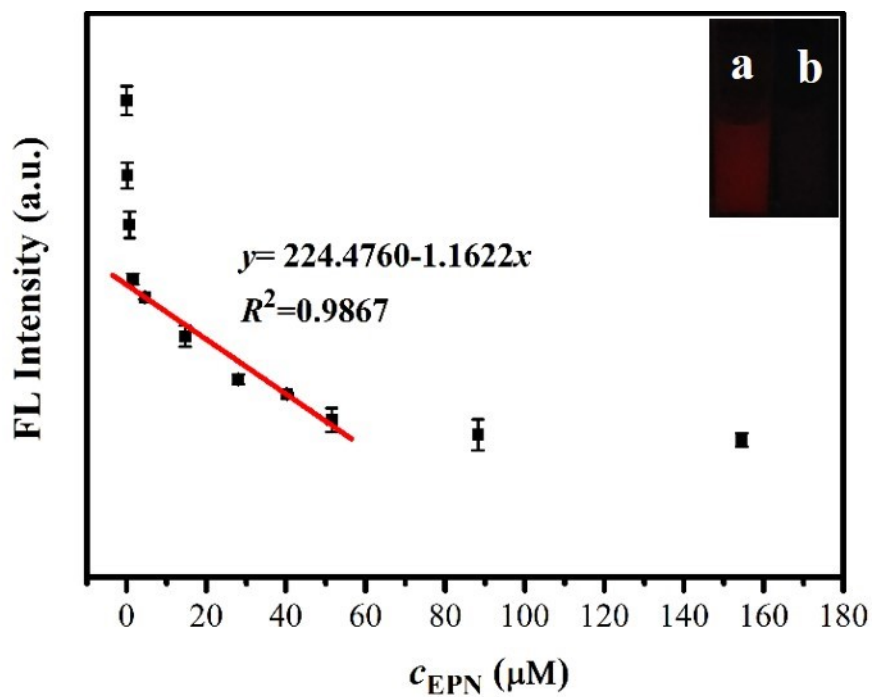

Fig. S5 linear equation of the fluorescence intensity of Eu:CeO<sub>2</sub> versus the concentrations of EPN( inset: images of (a) Eu:CeO<sub>2</sub>, (b) Eu:CeO<sub>2</sub> + ENP(160 μM) under 365 nm UV light).

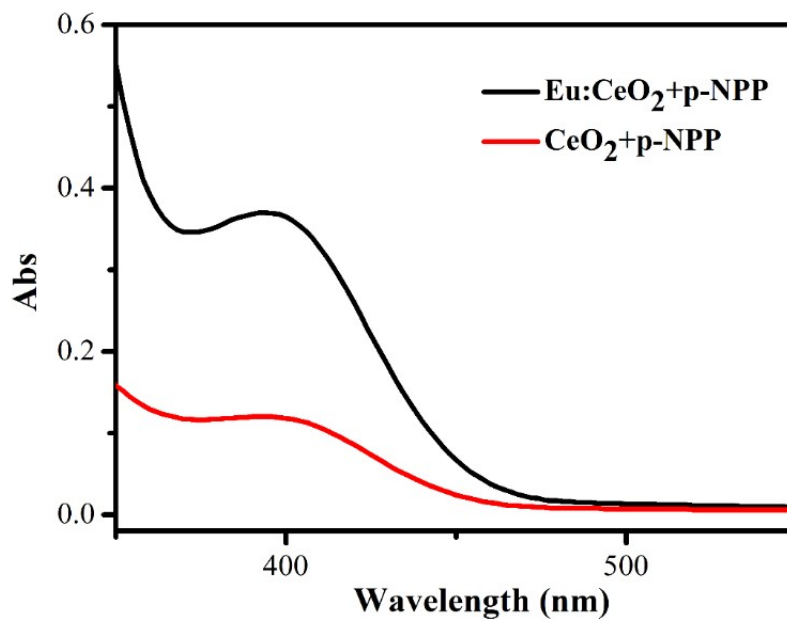

Fig. S6 Comparison of simulated phosphatase activity between CeO<sub>2</sub> and Eu:CeO<sub>2</sub>.



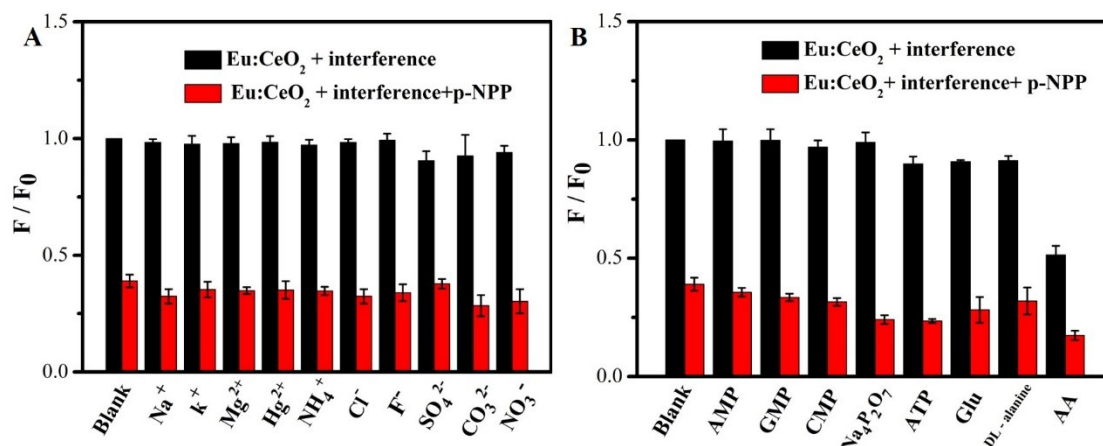

Fig. S10 Influence by various interference (Na<sup>+</sup>, K<sup>+</sup>, Mg<sup>2+</sup>, Hg<sup>2+</sup>, NH<sub>4</sub><sup>+</sup>, Cl<sup>-</sup>, F<sup>-</sup>, SO<sub>4</sub><sup>2-</sup>, CO<sub>3</sub><sup>2-</sup>, NO<sub>3</sub><sup>-</sup>, AMP, GMP, CMP, Na<sub>4</sub>P<sub>2</sub>O<sub>7</sub>, ATP, GLU, DL-alanine, AA).

Table S1 Comparison of different analytical methods for OPC detection

| OPC            | Method            | Liner range                | Detect limit         | Reference |
|----------------|-------------------|----------------------------|----------------------|-----------|
| EPN            | headspace SPME-GC | 0.1-0.8 mg/L               | 0.08 mg/L            | [1]       |
| EPN            | LC-MS             | 0.5-8 µg/L                 | 0.17 µg/L            | [2]       |
| EPN            | GC-MS(ASE)        | 0.01-1.0 mg/L              | 0.005 mg/L           | [3]       |
| paraoxon       | Fluorescence      | 25 - 400 µM                | 8 µM                 | [4]       |
| pretilachlor   | Fluorescence      | 5.7-61.5 µM                | 2.9 µM               | [5]       |
| ethyl paraoxon | Fluorescence      | 0.1- 0.5 mM                | 0.056 mM             | [6]       |
| dichlorvos     | Fluorescence      | 0-10 µM                    | 1.18µM               | [7]       |
| EPN            | Fluorescence      | 6-52 µM ( 1.94-16.81 mg/L) | 5.86 µM( 1.89 mg/L ) | This work |

Reference:

- [1] X. P. Lee, T. Kumazawa, K. Sato, O. Suzuki, *Chromatographia*, 1996, **42**, 135-140.
- [2] S. Inoue, T. Saito, H. Mase, Y. Suzuki, K. Takazawa, I. Yamamoto, S. Inokuchi, *J. Pharm. Biomed. Anal.*, 2007, **44**, 258–264.
- [3] S. K. Cho, A. M. A. El-Aty, H. R. Jeon, J. H. Choi, H. C. Shin and J. H.

Shim, *Biomed. Chromatogr.*, 2008, **22**, 727–735.

- [4] K. R. Rogers, Y. Wang, A. Mulchandani, P. Mulchandani and W. Chen, *Biotechnol. Progr.*, 1999, **15**, 517–521.
- [5] M. J. Deka, P. Dutta, S. Sarma, O. K. Medhi, N. C. Talukdar, D. Chowdhury, *Heliyon*, 2019, **5**, e01985.
- [6] M. Jain, P. Yadav, B. Joshi, A. Joshi, P. Kodgire, *Appl. Microbiol. Biotechnol.*, 2021, **105**, 389–400.
- [7] L. A. Ibrahim, A. M. Abbas, H. M. Darwish, *Luminescence*, 2017, **32**, 1541–1546.
